# Supplementary material
Source: Springer Nature journal article supplement (https://www.springermedizin.de/resource/supplementary/12876_2010_631_MOESM2_ESM.pdf/9437406)
Supplement: MOESM2 [file 9437406]

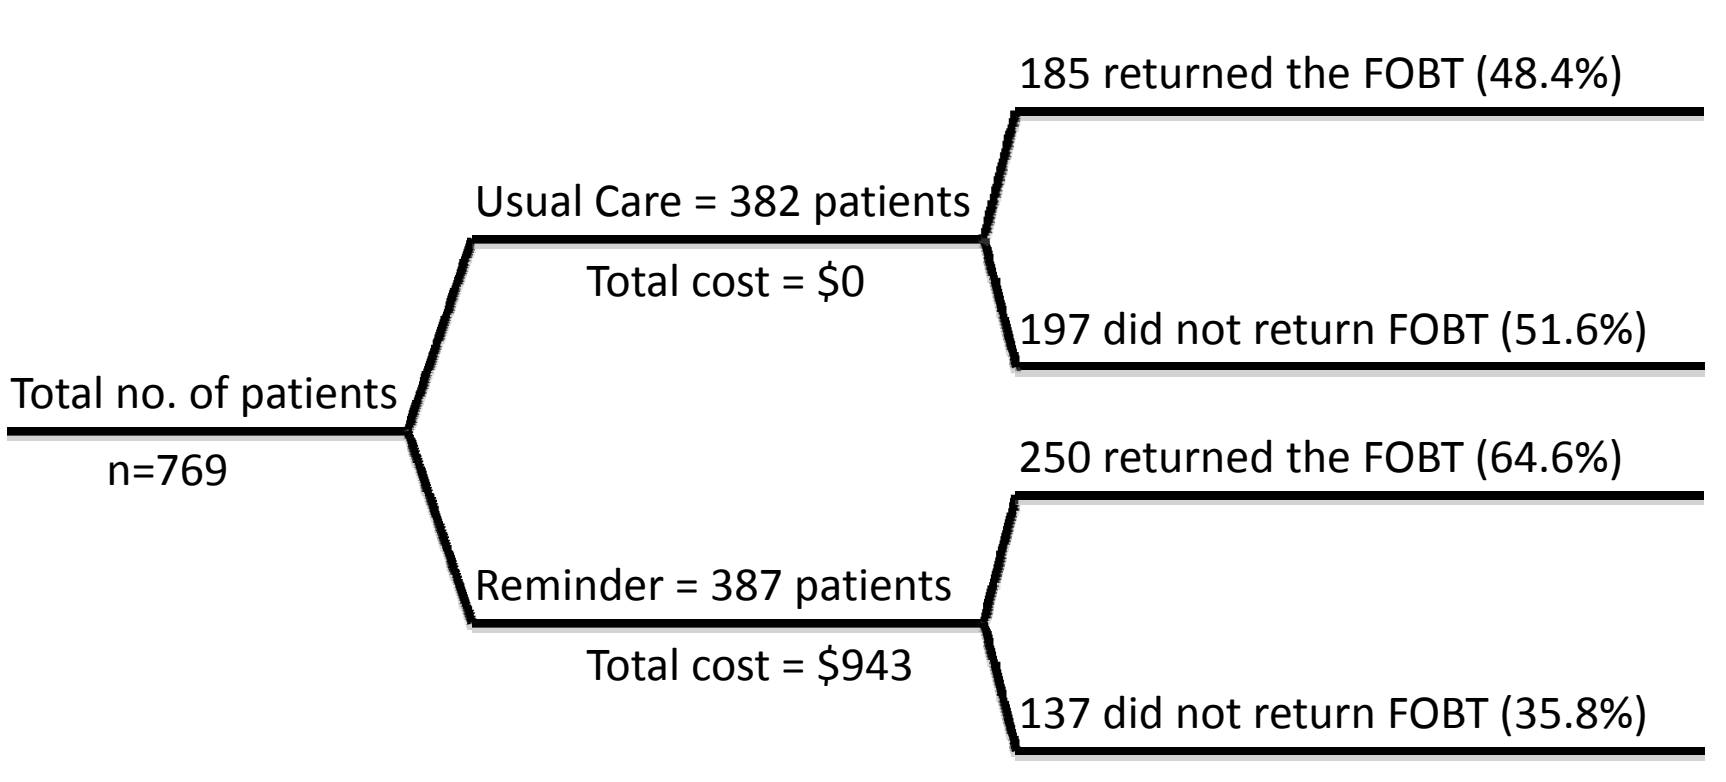

185 returned the FOBT (48.4%)

Usual Care = 382 patients

Total cost = \$0

197 did not return FOBT (51.6%)

Total no. of patients

n=769

250 returned the FOBT (64.6%)

Reminder = 387 patients

Total cost = \$943

137 did not return FOBT (35.8%)
